# Supplementary material for: Detecting forest response to droughts with global observations of vegetation water content
Source: PubMed Central journal article supplement (PMC9293345; doi:10.1111/gcb.15872), 2021-09-25
Supplement: GCB-27-6005-s001.pdf [file GCB-27-6005-s001.pdf]

1 **Supplementary Information for "Detecting Forest Response to Droughts with Global**  
2 **Observations of Vegetation Water Content"**

3

4 **Analogy between predator-prey models and forest ecohydrologic systems**

5 To illustrate the ‘genesis’ of hysteresis between VWC (labeled  $V$  for notational convenience)  
6 and root-zone water content ( $W$ ), a ‘truncated’ predator-prey analogy is used (Mrad et al., 2020),  
7 also known as the Lotka-Volterra model (Wangersky, 1978). Phenomenologically,  $V$  ‘preys’ on  
8  $W$ . The ‘prey’  $W$  is intermittently recharged by throughfall and stem flow, both assumed to be  
9 proportional to rainfall ( $P$ ) using a proportionality constant  $\alpha$  that depends on a plethora of  
10 factors including leaf area index. In this naïve system, the main water supply pool for the plant  
11 water pool is the soil water in the rooting zone and the main sink is the atmosphere (through leaf  
12 transpiration  $T_r$  from all the leaves). A predator-prey analogy that simplifies all the aggregate  
13 effects of 3-D water transport in the soil-plant system yet preserves elements of their interactive  
14 effects leads to the following set of dynamical equations:

$$\frac{dW}{dt} = -aWV + \alpha P \quad (\text{Eq. S1})$$

$$\frac{dV}{dt} = +bWV - T_r, \quad (\text{Eq. S2})$$

15 where  $a$  and  $b$  are constants to be determined. A trivial case can be considered when the system  
16 is hydrologically closed (i.e.  $P = 0$  and  $T_r = 0$ ). In such a closed system, there is no hysteretic  
17 interaction between plant-water storage and soil moisture because  $\frac{dW}{dV} = -\frac{a}{b}$ . Thus,  $W$  must  
18 linearly relate to  $V$ . This can be written as:

$$V = -\frac{a}{b}W + k. \quad (\text{Eq. S3})$$

19 This finding is compatible with the fact that in a ‘closed system’, the total water  $A_T$  must be  
 20 conserved, meaning  $W + V$  is a constant ( $= A_T$ ) at all times. However, this finding is opposite  
 21 to the quasi-linear relation between  $W$  and  $V$  with a *positive slope* routinely reported in  
 22 measurements and model results (Figure 6). This finding does not invalidate the predator-prey  
 23 analogy but points to the obvious need for an open system with water losses.

24 Relaxing the closed system assumption by introducing transpirational losses in Eq. S2 is first  
 25 considered. The focus is on a single dry-down event where  $W(t)$  and  $V(t)$  are both maximum  
 26 after an extended rainfall event so that the maximum capacity of the stored water in the soil plant  
 27 system is  $A_T(0) = W(0) + V(0)$ . Unlike the closed system case,  $dA_T/dt = -T_r$  instead of  
 28 zero. To proceed further, transpiration is assumed to be proportional to  $V$  and  $\frac{a}{b} = 1$  must be  
 29 invoked to satisfy conservation of mass. The predator-prey system becomes

$$\frac{dW}{dt} = -a WV \quad (\text{Eq. S4})$$

$$\frac{dV}{dt} = +a WV - c V = aV \left( W - \frac{c}{a} \right), \quad (\text{Eq. S5})$$

30 where  $c$  is a constant reflecting the transpirational losses. Dividing eqn. S5 by S4 to eliminate  
 31 time, the autonomous dynamical system yields

$$\frac{dV}{dW} = -1 + \left(\frac{c}{a}\right) \frac{1}{W}. \quad (\text{Eq. S6})$$

32 Integrating this ordinary differential equation yields

$$V(t) - V(0) = W(0) - W(t) + \left(\frac{c}{a}\right) \log \left[ \frac{W(t)}{W(0)} \right], \quad (\text{Eq. S3})$$

33 where  $W(0)$  and  $V(0)$  are the soil and plant water storage at the beginning of a dry-down. The  
 34 hysteresis becomes evident because at a given time  $t$ , there are multiple values of  $W(t)$  that  
 35 satisfy a single  $V(t)$ . The so-called ‘symmetric dynamics’ between  $W$  and  $V$  in a closed system  
 36 (eqn. s5) also suggests that losses must play a role in both the sign and deviations from linearity  
 37 in the two-water pool system as evidenced by the role of  $\left(\frac{c}{a}\right)$  in Eq. S6.

38

39 Pushing this analogy further, if  $\left(\frac{c}{a}\right) \frac{1}{W} > 1$ , then  $\frac{dV}{dW} > 0$ , suggestive of a positive slope  
 40 and non-linear relation between  $W$  and  $V$ . However, when  $\left(\frac{c}{a}\right) \frac{1}{W} < 1$ , a decreasing  $W$  leads to  
 41 increasing  $V$ . Such a case is expected when  $c$  takes on a zero value (at night with transpiration  
 42 small) but a positive value during the day (higher transpiration). Obvious extensions are that  $c$   
 43 varies with time (due to fast drivers of transpiration such as vapor pressure deficit and  
 44 photosynthetically active radiation), and transpiration is non-linearly related to  $S$ . These  
 45 extensions do not alter the qualitative character of the analogy here to explain the hysteretic  
 46 behavior.

47

48 As a bridge to Figure 6, Eq S6 is illustrated for an effective rooting zone depth of 0.5 m,  
 49 soil porosity of 0.5,  $W(0)$  set to 50% of the soil porosity, and  $V(0) = 10 \text{ kg m}^{-2}$  with  $\frac{c}{a} = 60 \text{ kg}$

50  $m^{-2}$  (Fig S1). The hysteresis emerges when noting that for a given  $V(t)$ , two possible  $W(t)$   
51 satisfy Eq. s6.

52

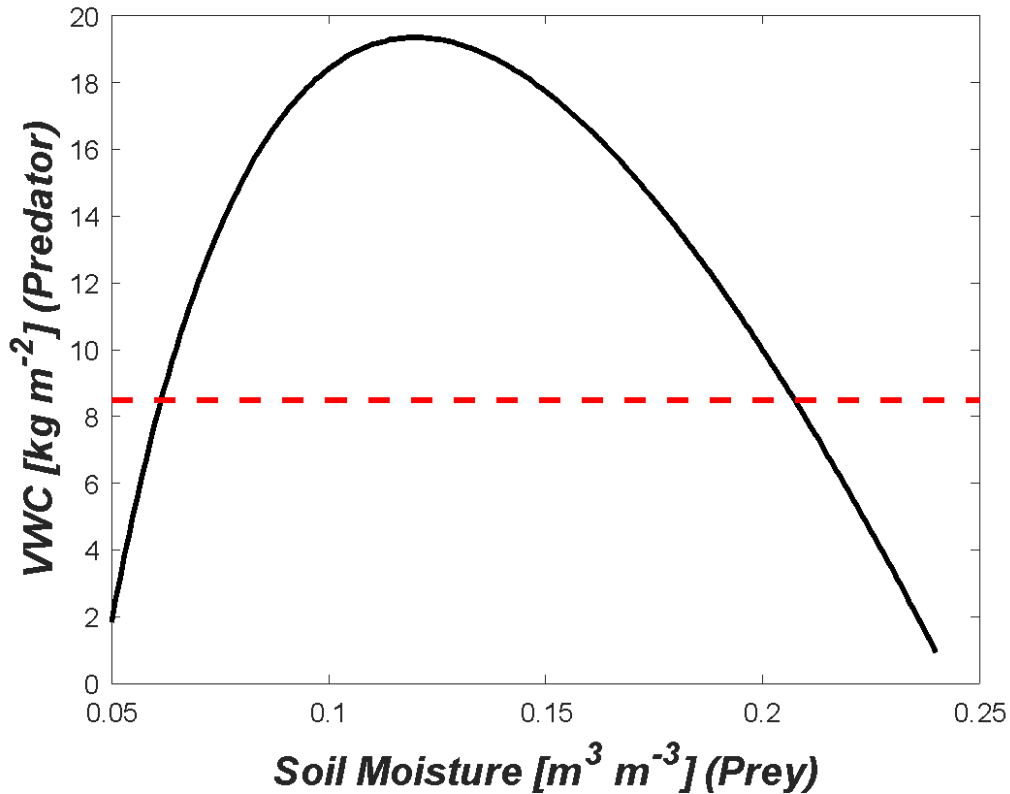

53  
54

55 *Fig. S1: Illustration of the theoretical relationship between VWC and soil moisture in the*  
56 *predator-prey analogy. For a given VWC value, there are multiple associated possible soil*  
57 *moisture values, giving rise to hysteresis. Multiple versions of this curve are possible depending*  
58 *on the initial conditions, but hysteresis is a constant feature.*

59

## 60 References

61

62 Mrad, A., Katul, G. G., Levia, D. F., Guswa, A. J., Boyer, E. W., Bruen, M., et al. (2020). Peak  
63 grain forecasts for the US High Plains amid withering waters. *Proceedings of the*  
64 *National Academy of Sciences*, 117(42), 26145–26150.

65 <https://doi.org/10.1073/pnas.2008383117>

66

67 Wangersky, P. J. (1978). Lotka-Volterra population models. *Annual Review of Ecology and*  
68 *Systematics*, 9(1), 189–218.

69
